# Supplementary material for: Oxylipin Profiles as Functional Characteristics of Acute Inflammatory Responses in Astrocytes Pre-Treated with IL-4, IL-10, or LPS
Source: PubMed Central journal article supplement (PMC7084882; doi:10.3390/ijms21051780), 2020-03-05
Supplement: ijms-21-01780-s001.pdf [file ijms-21-01780-s001.pdf]

# Oxylipin profiles as functional characteristics of acute inflammatory responses in astrocytes pre-treated with IL-4, IL-10 or LPS

## Supplementary Information

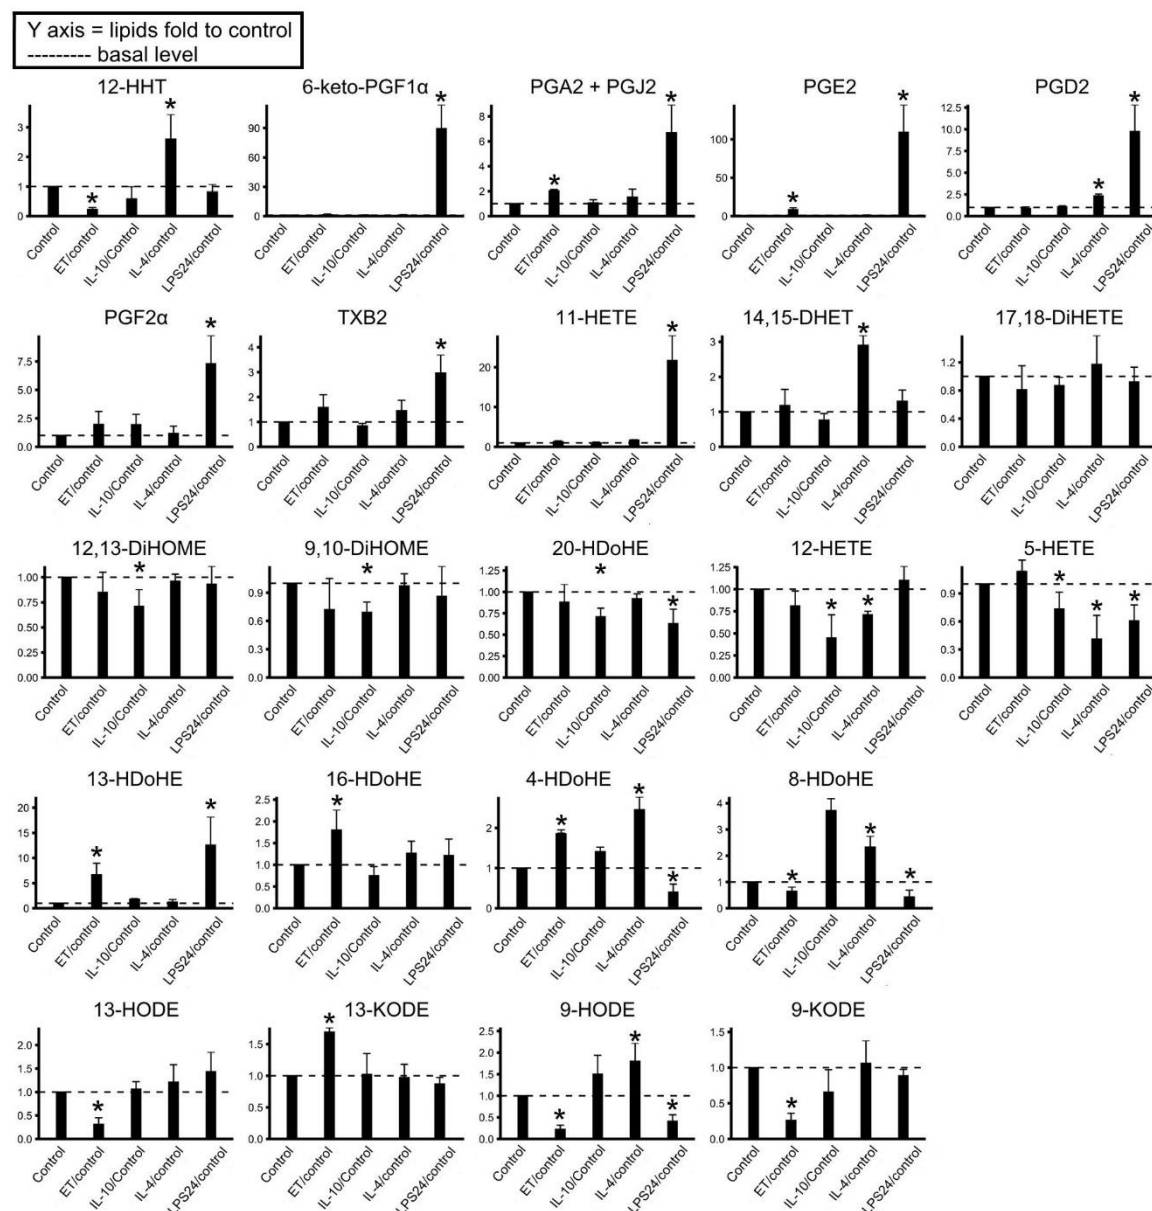

**Figure S1.** The effect of astrocyte polarization on the oxylipins release. Primary rat astrocytes were adapted to endotoxin in the tolerance model (ET, 10 ng/ml LPS, 48h) or pretreated with IL-10 (20 ng/ml) or IL-4 (10 ng/ml), or LPS (100 ng/ml) for 24 h. Concentrations of oxylipins in supernatants were measured using UPLC-MS/MS. Results are expressed as fold-changes, relative to untreated cells.  $*p < 0.05$ , compared with the unstimulated cells.

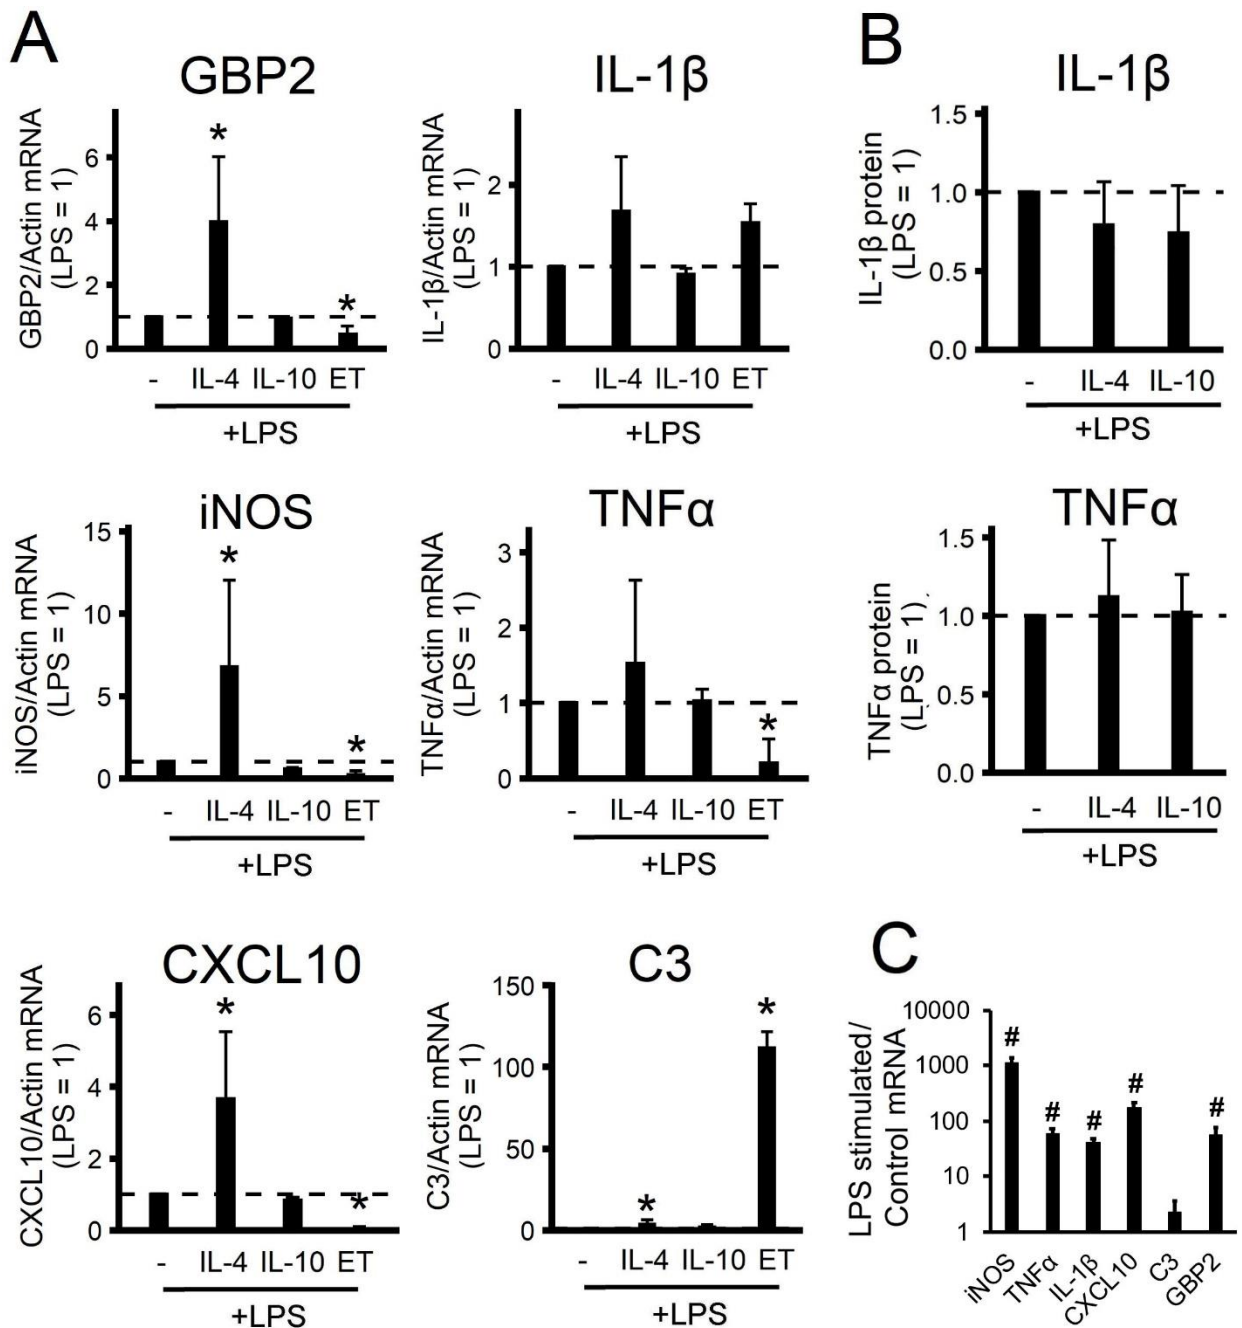

**Figure S2.** The effect of astrocyte polarization on the oxylipins release. Primary rat astrocytes were adapted to endotoxin in the tolerance model (ET, 10 ng/ml LPS, 48h) or pretreated with IL-10 (20 ng/ml) or IL-4 (10 ng/ml), or LPS (100 ng/ml) for 24 h and then stimulated with LPS (100 ng/ml) for 4 hours. Concentrations of oxylipins in supernatants were measured using UPLC-MS/MS. Results are expressed as fold-changes, relative to LPS-stimulated cells. \* $p < 0.05$ , compared with the LPS-stimulated cells.
